# Supplementary material
Source: publisher figshare collection journal article supplement (https://acs.figshare.com/ndownloader/files/18497804)
Supplement: Supplementary file 1 [file 18497804]

# V-Shape Molecular Self-Adaption Triggered 2D Self-Assembled Polymorphism by Coadsorption of *n*-Tetradecane Solvent

Yujia Wang<sup>‡</sup>, Jinxing Li<sup>‡</sup>, Tianze Hu, Meiqiu Dong, Juntian Wu, Xinrui Miao\*, Wenli Deng\*

College of Materials Science and Engineering, South China University of Technology, Guangzhou 510640,  
People's Republic of China.

**E-mail:** msxrmiao@scut.edu.cn, wldeng@scut.edu.cn

## Synthesis and Characterization of TPTD-Nap

### Scheme S1 for the synthesis of TPTD-Nap

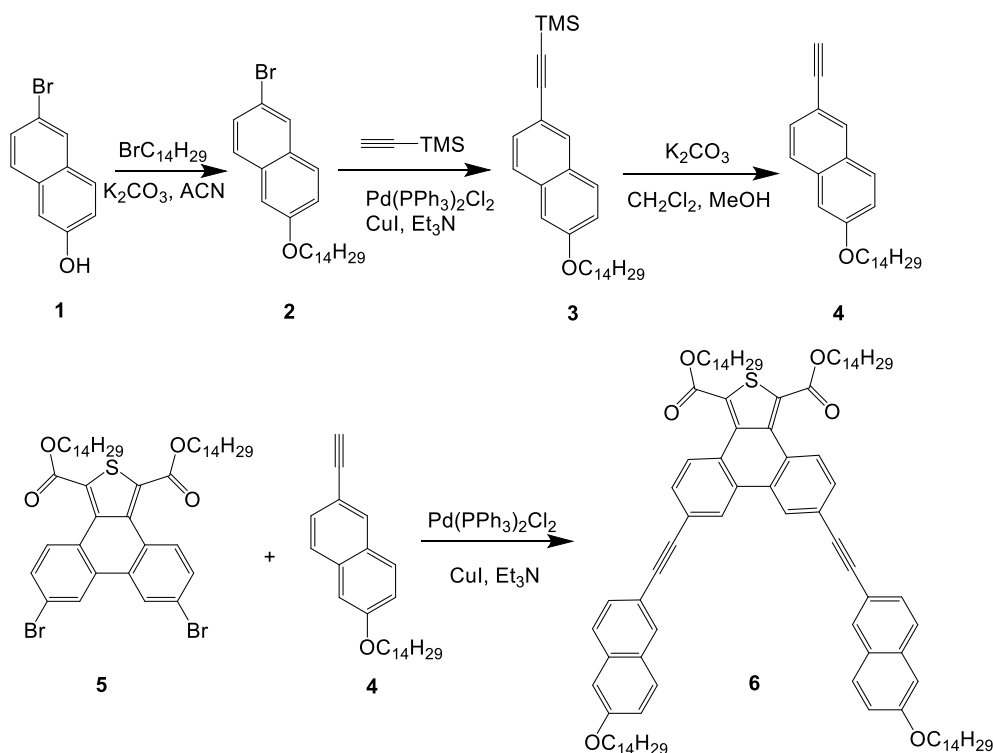

#### 2-Bromo-6-tetradecyloxy-naphthalene (compound 2)

A mixture of 6-bromo-2-naphthol (6.00 g, 26.9 mmol), 1-bromotetradecane (13.25 g, 48 mmol), potassium carbonate (6.60 g, 48 mmol) and acetonitrile (100 ml), and then, this was stirred at 85 °C overnight. The solvent was removed under reduced pressure, and the obtained residue was poured into water and extracted with dichloromethane, washed with water and dried over  $\text{MgSO}_4$ . After removing the solvent under reduced pressure and purifying by column chromatography eluted using hexane to yield compound 2 (9.94g, 88%).

$^1\text{H NMR}$  (600 MHz,  $\text{CDCl}_3$ , ppm):  $\delta$  7.93 (1H, m), 7.65 (1H, m), 7.60 (1H, m), 7.50 (1H, m), 7.17 (1H, m), 7.11 (1H, m), 4.08 (2H, m), 1.86 (2H, m), 1.51 (2H, m), 1.28 (20H, m), 0.90 (3H, m).

#### 2-[2-(trimethylsilyl)ethynyl]- 6-hexadecyloxy-naphthalene (compound 3)

A mixture of 2-Bromo-6-tetradecyloxy-naphthalene (5.35 g, 12.8 mmol), trimethylsilylacetylene (2.2 ml, 16 mmol),  $\text{Pd}(\text{PPh}_3)_2\text{Cl}_2$  (0.12 g, 0.16 mmol), triethylamine (33 ml), and  $\text{CuI}$  (0.03 g, 0.48 mmol) was stirred and at 80 °C for 24 h. After removal of the reaction solvent at reduced pressure, petroleum ether was added (100 mL) and the organic layer washed with aq.  $\text{HCl}$  5% (50 mL). The organic phase was dried by  $\text{MgSO}_4$ , and petroleum ether was evaporated. The crude product (viscous liquid) was purified by column chromatography eluted using hexane to yield compound 3 (4.75 g, 85%).

<sup>1</sup>H NMR (600 MHz, CDCl<sub>3</sub>, ppm): δ 7.74 (1H, m), 7.49 (1H, m), 7.44 (1H, m), 7.28 (1H, m), 6.96 (1H, m), 6.90 (1H, m), 3.89 (2H, m), 1.67 (2H, m), 1.32 (2H, m), 1.08 (20H, m), 0.72 (3H, m), 0.10 (9H, m).

#### **2-ethynyl-6-tetradecyloxy-naphthalene (compound 4)**

A mixture of 2-[2-(trimethylsilyl)ethynyl]-6-hexadecyloxy-naphthalene (2.4 g 5.5 mmol), potassium carbonate (3.9 g, 28 mmol), THF (20 ml), and MeOH (20 ml) was stirred at room temperature for 3 h. The solvent was removed under reduced pressure, and the obtained residue was extracted with ether, washed with water and dried over MgSO<sub>4</sub>. The solvent was removed to yield compound 4 (1.38 g, 69%).

<sup>1</sup>H NMR (600 MHz, CDCl<sub>3</sub>, ppm): δ 7.74 (1H, m), 7.49 (1H, m), 7.44 (1H, m), 7.28 (1H, m), 6.96 (1H, m), 6.90 (1H, m), 3.89 (2H, m), 1.67 (2H, m), 1.32 (2H, m), 1.08 (20H, m), 0.72 (3H, m), 0.10 (9H, m).

#### **Ditetradecyl 6,9-bis((6-(tetradecyloxy)naphthalen-2-yl)ethynyl)phenanthro[9,10-c]thiophene-1,3-dicarboxylate (TPTD-Nap compound 6)**

A mixture of 6,9-TPTD (**compound 5**)<sup>1</sup> 8.35 g (9.6 mmol), 2-ethynyl-6-hexadecyloxy-naphthalene (**compound 4**) 7.0 g (19.2 mmol), Pd(PPh<sub>3</sub>)<sub>2</sub>Cl<sub>2</sub> (0.35 g, 0.48 mmol), triethylamine (33 ml), and CuI (91 mg, 0.48 mmol) was stirred and at 80 °C for 24 h. After removal of the reaction solvent at reduced pressure, petroleum ether was added (100 mL) and the organic layer washed with aq. HCl 5% (50 mL). The organic phase was dried by MgSO<sub>4</sub>, and petroleum ether was evaporated. The crude product was purified by column chromatography eluted using hexane to yield compound 6 (7.32 g, 53%).

<sup>1</sup>H NMR (600 MHz, CDCl<sub>3</sub>, ppm): δ 8.81 (2H, m), 8.61 (2H, m), 8.01 (2H, m), 7.67 (2H, m), 7.64 (2H, m), 7.62 (2H, m), 7.57 (2H, m), 7.12 (2H, m), 7.06 (2H, m), 4.39 (4H, m), 4.02 (4H, m), 1.78 (8H, m), 1.43 (8H, m), 1.19 (80H, m), 0.81 (12H, m).

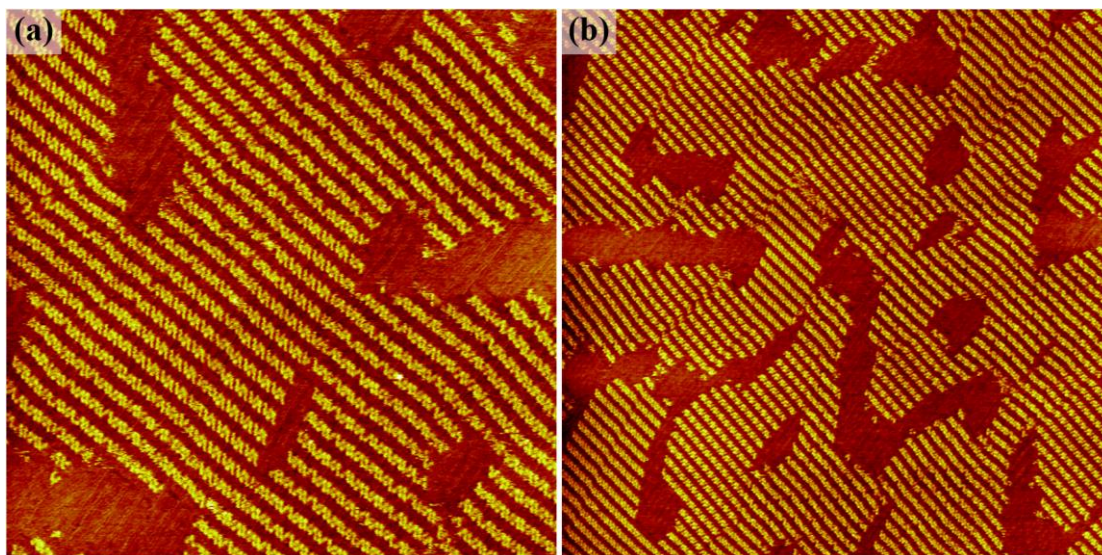

**Figure S1.** Large-scale STM images (a) ( $100 \times 100 \text{ nm}^2$ ) and (b) ( $200 \times 200 \text{ nm}^2$ ) of TPTD-Nap self-assembly at the tridecane/HOPG interface ( $c = 6.2 \times 10^{-5} \text{ M}$ ). Scanning parameters:  $V_{bias} = 592 \text{ mV}$  and  $I_t = 458 \text{ pA}$ .

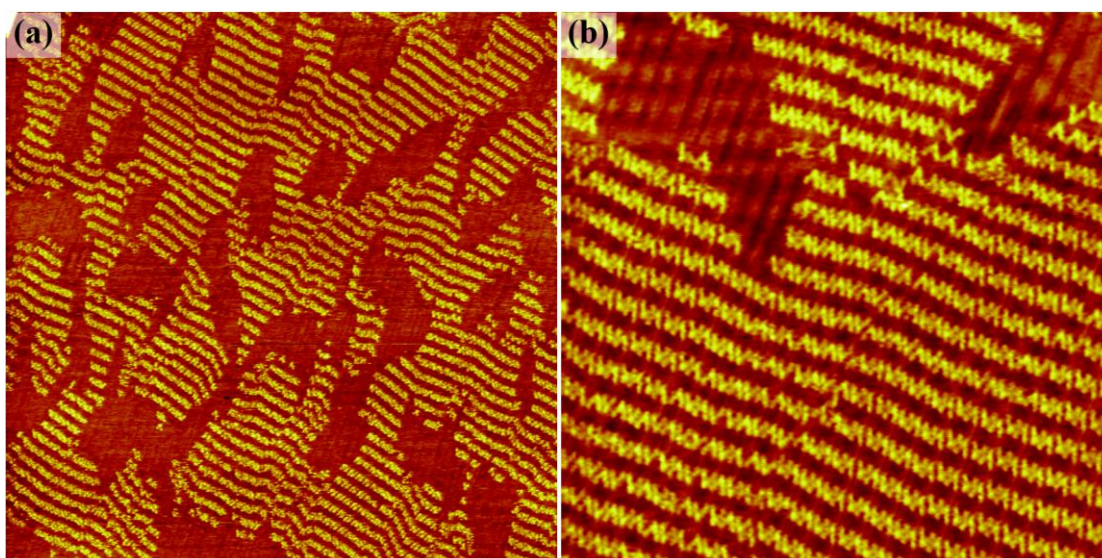

**Figure S2.** Large-scale STM images (a) ( $200 \times 200 \text{ nm}^2$ ) and (b) ( $60 \times 60 \text{ nm}^2$ ) of TPTD-Nap self-assembly at the hexadecane/HOPG interface ( $c = 3.6 \times 10^{-5} \text{ M}$ ). Scanning parameters:  $V_{bias} = 585 \text{ mV}$  and  $I_t = 490 \text{ pA}$ .

## Reference

1. Zha, B.; Miao, X.; Liu, P.; Wu, Y.; Deng, W. Concentration Dependent Halogen-Bond Density in the 2D Self-Assembly of a Thienophenanthrene Derivative at the Aliphatic Acid/Graphite Interface. *Chem. Commun.* **2014**, *50*, 9003-9006.
